# Supplementary material
Source: PubMed Central journal article supplement (PMC7736214)
Supplement: NIHMS1637208-supplement-1.pdf [file NIHMS1637208-supplement-1.pdf]

## Single transient intraocular pressure elevations cause prolonged retinal ganglion cell dysfunction and retinal capillary abnormalities in mice

Xiaofeng Tao, Rohini R. Sigireddi, Peter D. Westenskow, Roomasa Channa, Benjamin J. Frankfort

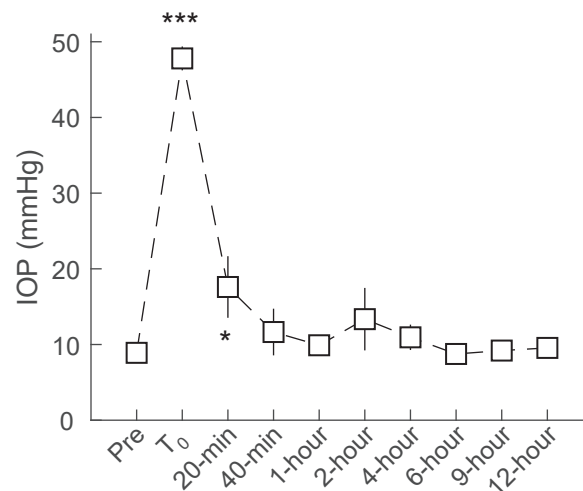

**Supplemental Figure 1. Short-term intraocular pressure elevation following viscoelastic injection.** IOPs from 10 mice were measured before viscoelastic injection (Pre), immediately after injection (T0), and at various time points after injection (20-min to 12-hour). Vertical bars represent 1 SEM. Post-injection IOPs were compared to baseline (Pre) and statistically tested with one-tailed t-tests. \*\*\*  $p < 0.001$ ; \*  $p < 0.05$ .
